# Supplementary material
Source: PubMed Central journal article supplement (PMC9615439)
Supplement: NIHMS1787014-supplement-1.pdf [file NIHMS1787014-supplement-1.pdf]

Supplementary Material

Supplementary Figure 1

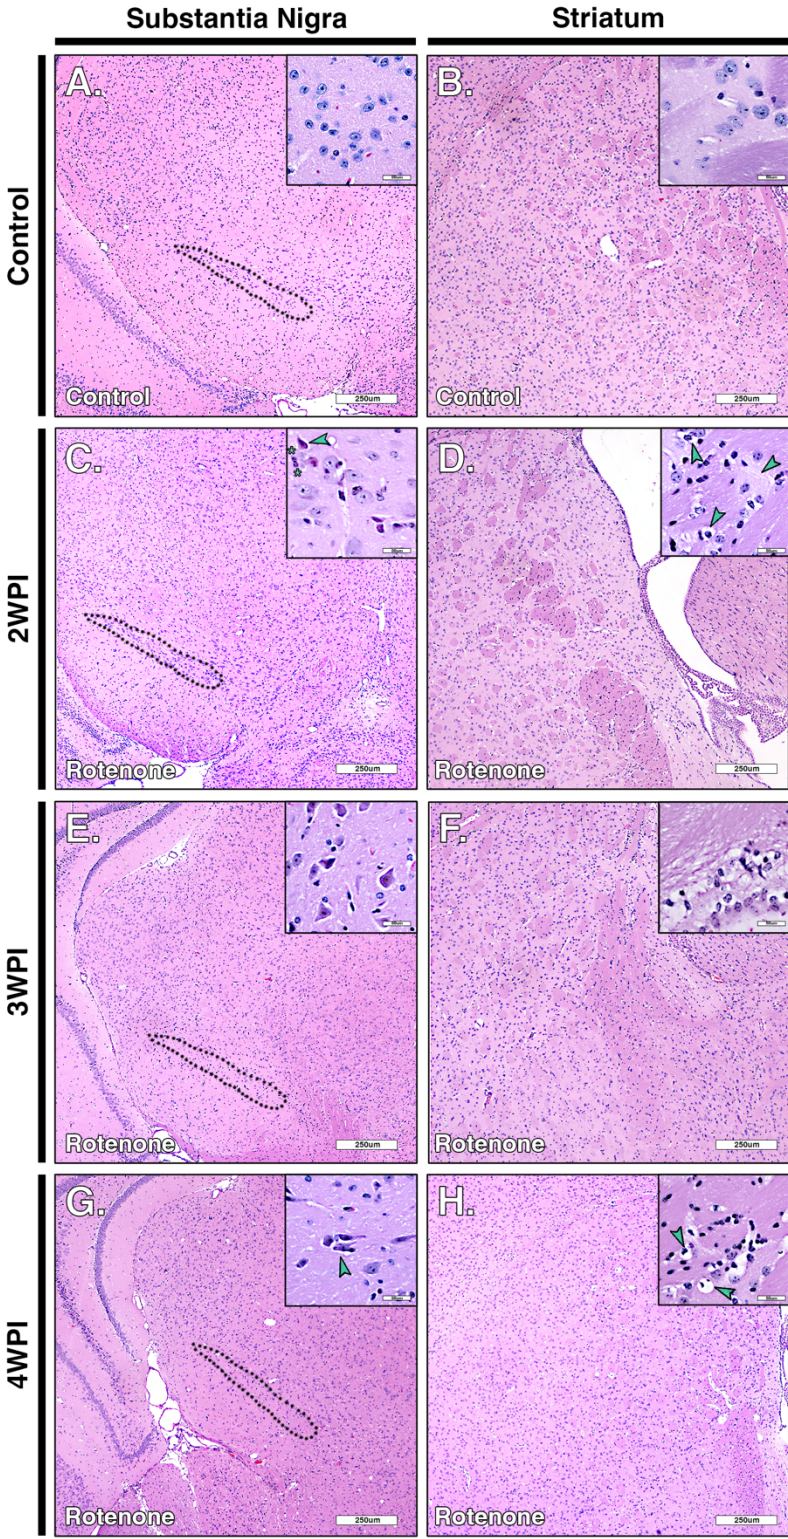

**Supplementary Figure 1. Pathological analysis reveals time-dependent neuronal and glial changes within the nigro-striatal system following systemic administration of rotenone. (A,B)**

Control animals presented with normal cellular borders, with margins in the SN (A) and the ST (B) that were unremarkable in the cell populations present and had clear striosomes and axonal functionality. Pathological changes within the SN at 2WPI reveal hyper-eosinophilic cytoplasmic neurons (C, arrowheads) with focal neuronal apoptosis and presentation of Alzheimer Type II cells (C, asterisk). Cytotoxic edema is present surrounding glial cells within the ST and there is rare intramyelinic edema (D, arrowheads). (E) The SN at 3WPI had decreased numbers of neurons within the SN, with surviving neurons characterized by angular morphology, along with prolific spongiosis in the ST and persistent intramyelinic edema (F). Marked loss of neuronal density was observed in the SN at 4WPI with the occurrence of angular bordered cells (G, arrowheads). Cytotoxic edema was present within the ST (H, arrowheads), and glial cell infiltration into striosomes.

Supplementary Figure 2

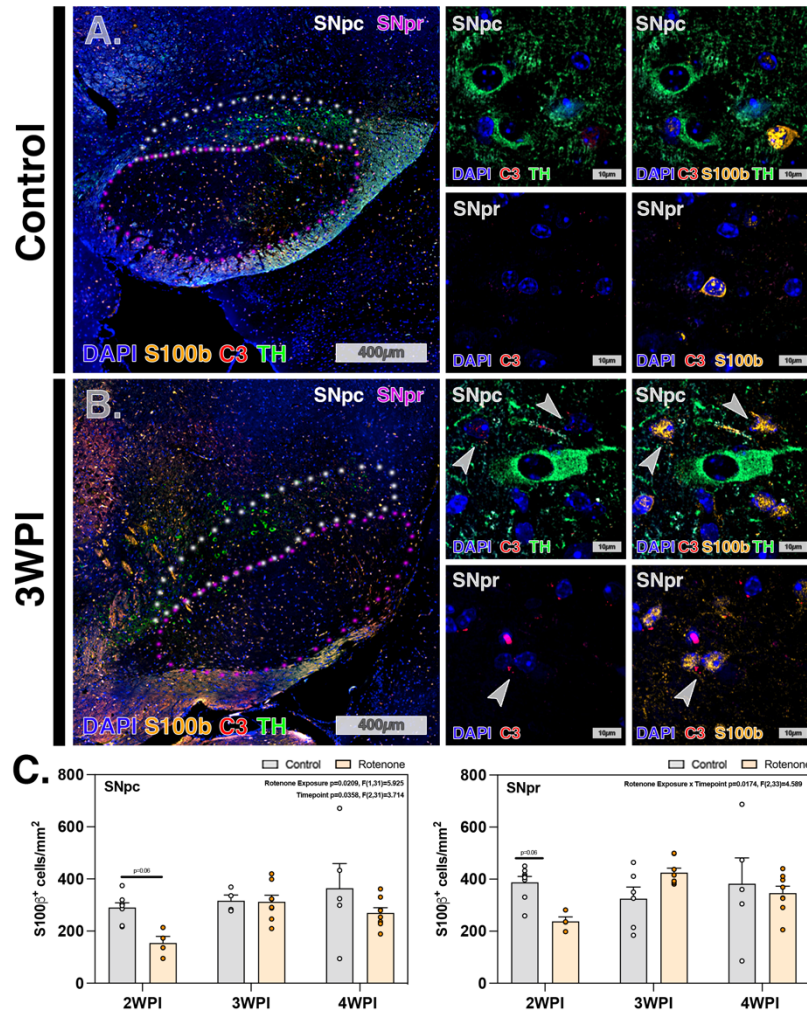

**Supplementary Figure 2. S100β<sup>+</sup> populations' adaptation to rotenone exposure is time dependent.** Montage images of control (A) and 3 WPI rotenone exposed (B) animals with high magnification inserts of TH<sup>+</sup> dopaminergic neurons (green), S100β<sup>+</sup> astrocytes (orange), and C3 (red) in the SNpc and SNpr. S100β<sup>+</sup> cell types correlating with positive C3 staining (arrowheads) (A-B, high magnification) and quantification of overall S100β<sup>+</sup> populations in the SNpc and SNpr (C).
